# Supplementary material
Source: publisher site journal article supplement (https://www.dovepress.com/article/478347)
Supplement: Supplementary file 1 [file get_supplementary_file.php]

**Supplementary Table 1**

| **Questions** | **Answers** |
| --- | --- |
| **General Information** | |
| What is you gender? | - Male - Female |
| What is your age range? | - Less than 30 years old - 30-39 years old - 40-50 years old - More than 50 years old |
| What is your nationality? | - Saudi - Non-Saudi |
| What is your position? | - Consultant - Fellow - Resident |
| In which province do you practice? | - Eastern province - Central province - Northern province - Southwest province - Other |
| Where do you practice? | - Governmental hospital - Private hospital - Private clinic - PHC |
| Years of professional experience in otolaryngology? | - Less than 5 years - 5-9 years - 10-20 years - More than 20 years |
| If you are a consultant, what is your subspecialty? | - General otolaryngology - Laryngology - Rhinology - Otology - Pediatric otolaryngology - Head and neck oncology - Plastic and reconstructive surgery - I am not a consultant |
| How many patients do you see per day? | - Less than 10 - 10-15 - 15-20 - More than 20 |
| **Self-rated understanding of artificial intelligence** | |
| Are you familiar with artificial intelligence? | - Excellent - Above average - Average - Below average - Very poor |
| Are you familiar with the artificial intelligence applications in the field of otolaryngology? | - Excellent - Above average - Average - Below average - Very poor |
| **Feelings and attitudes toward artificial intelligence in the field of otolaryngology** | |
| Artificial intelligence otolaryngological instruments are superior to traditional practice. | - Strongly Agree - Agree - Neutral - Disagree - Strongly Disagree |
| Artificial intelligence enables otolaryngologists to make more accurate decisions. | - Strongly Agree - Agree - Neutral - Disagree - Strongly Disagree |
| Artificial intelligence will be a qualitative shift in the otolaryngology surgeries in terms of reducing the duration of operations. | - Strongly Agree - Agree - Neutral - Disagree - Strongly Disagree |
| Artificial intelligence will be a qualitative shift in the otolaryngology surgeries in terms of reducing the complications of surgery. | - Strongly Agree - Agree - Neutral - Disagree - Strongly Disagree |
| I am willing to incorporate artificial intelligence into my practice. | - Strongly Agree - Agree - Neutral - Disagree - Strongly Disagree |
| Artificial intelligence will replace physicians in the future. | - Strongly Agree - Agree - Neutral - Disagree - Strongly Disagree |
| Artificial intelligence facilitates patient education. | - Strongly Agree - Agree - Neutral - Disagree - Strongly Disagree |
| Artificial intelligence is important to learn in the otolaryngology curriculum. | - Strongly Agree - Agree - Neutral - Disagree - Strongly Disagree |
| **Training in artificial intelligence as part of the otolaryngology residency program curriculum** | |
| The application of artificial intelligence to detect head and neck tumors using radiological imaging. | - Strongly Agree - Agree - Neutral - Disagree - Strongly Disagree |
| The application of artificial intelligence as a radiotherapy planning of head and neck tumors. | - Strongly Agree - Agree - Neutral - Disagree - Strongly Disagree |
| The application of artificial intelligence to diagnose vocal cord disorders in laryngoscope examination. | - Strongly Agree - Agree - Neutral - Disagree - Strongly Disagree |
| The application of artificial intelligence to diagnose paranasal sinuses diseases in radiological imaging. | - Strongly Agree - Agree - Neutral - Disagree - Strongly Disagree |
| The application of artificial intelligence to classify hearing loss phenotypes. | - Strongly Agree - Agree - Neutral - Disagree - Strongly Disagree |
| The application of artificial intelligence in scientific research. | - Strongly Agree - Agree - Neutral - Disagree - Strongly Disagree |
